# Supplementary material for: A Practical Method for Amino Acid Analysis by LC-MS Using Precolumn Derivatization with Urea
Source: MDPI journal article supplement (doi:10.3390/ijms24087332), 2023-04-15
Supplement: s1 [file s1]

## Supporting Information

### A practical method for amino acid analysis by LC-MS using precolumn derivatization with urea

Runjin Zhao<sup>a,b</sup>, Biling Huang<sup>a, b</sup>, Gang Lu<sup>a</sup>, Songsen Fu<sup>a, b \*</sup>, Jianxi Ying<sup>a, b \*</sup> and Yufen Zhao<sup>a, b, c, d</sup>

a Institute of Drug Discovery Technology, Ningbo University, Ningbo, 315211, P.R. China

b Qian Xuesen Collaborative Research Center of Astrochemistry and Space Life Sciences, Ningbo University, Ningbo, 315211, P.R. China

c Department of Chemical Biology, College of Chemistry and Chemical Engineering, and the Key Laboratory for Chemical Biology of Fujian Province, Xiamen University, Xiamen, 361005, P.R. China

d Key Lab of Bioorganic Phosphorus Chemistry & Chemical Biology, Department of Chemistry, Tsinghua University, Beijing, 100084, P.R. China

Corresponding author: \*Jianxi Ying, yingjianxi@nbu.edu.cn

\*Songsen Fu, fusongsen@nbu.edu.cn;

### Contents

|                                                                                                       |    |
|-------------------------------------------------------------------------------------------------------|----|
| Figure S1. EIC-MS profile of Phe and Carbamoyl-Phe.....                                               | 3  |
| Figure S2. EIC-MS profile of the product carbamoyl-Phe. ....                                          | 4  |
| Figure S3. LC-MS-EIC profile of control sample and derivatization reaction sample of Ala.....         | 5  |
| Figure S4. LC-MS-EIC profile of control sample and derivatization reaction sample of Phe.....         | 6  |
| Figure S5. LC-UV profile of Ala and Carbamoyl-Ala (210 nm). ....                                      | 7  |
| Figure S6. LC-UV profile of Phe and Carbamoyl-Phe (210 nm). ....                                      | 8  |
| Figure S7. The yield of carbamoyl-Phe under different pH conditions (3-11). ....                      | 9  |
| Figure S8. EIC-MS profile of carbamoyl-Ala under different pH conditions (3-11). ....                 | 10 |
| Figure S9. EIC-MS profile of carbamoyl-Phe under different pH conditions (3-11). ....                 | 11 |
| Figure S10. The yield of carbamoyl-Phe under different temperature conditions (37 °C -80 °C). ....    | 12 |
| Figure S11. EIC-MS profile of carbamoyl-Ala under different temperature conditions (37 °C -80 °C). .. | 13 |
| Figure S12. EIC-MS profile of carbamoyl-Phe under different temperature conditions (37 °C -80 °C). .  | 14 |
| Figure S13. The yield of carbamoyl-Phe under different time conditions (1-8 h). ....                  | 15 |
| Figure S14. EIC-MS profile of carbamoyl-Ala under different time conditions (1-8 h). ....             | 16 |
| Figure S15. EIC-MS profile of carbamoyl-Phe under different time conditions (1-8 h). ....             | 17 |
| Figure S16. EIC-MS profile of 20 amino acid before and after derivatization.....                      | 18 |
| Figure S17. EIC-MS profile of 3,3'-disulfanediybis(2-ureidopropanoic acid). ....                      | 19 |
| Figure S18. EIC-MS profile of N <sup>2</sup> , N <sup>6</sup> -dicarbamoyllysine. ....                | 20 |
| Figure S19. Derivatization of complex sample. ....                                                    | 21 |
| Figure S20. EIC-MS profile of carbamoyl-Phe-Phe. ....                                                 | 22 |

|                                                                               |           |
|-------------------------------------------------------------------------------|-----------|
| Table S1 EIC-MS extraction range of AA and CAA. ....                          | <b>23</b> |
| Table S2 Changes in retention time before and after AA derivatization ....    | <b>24</b> |
| Table S3 Derivatized conversion rate of 20 AA Mixtures. ....                  | <b>25</b> |
| Table S4. Formulation of cell culture medium DMEM. ....                       | <b>26</b> |
| Table S5. Formulation of cell culture medium RPMI 1640. ....                  | <b>27</b> |
| Table S6 Derivatized conversion rate of AAs in Cell culture medium DMEM. .... | <b>28</b> |

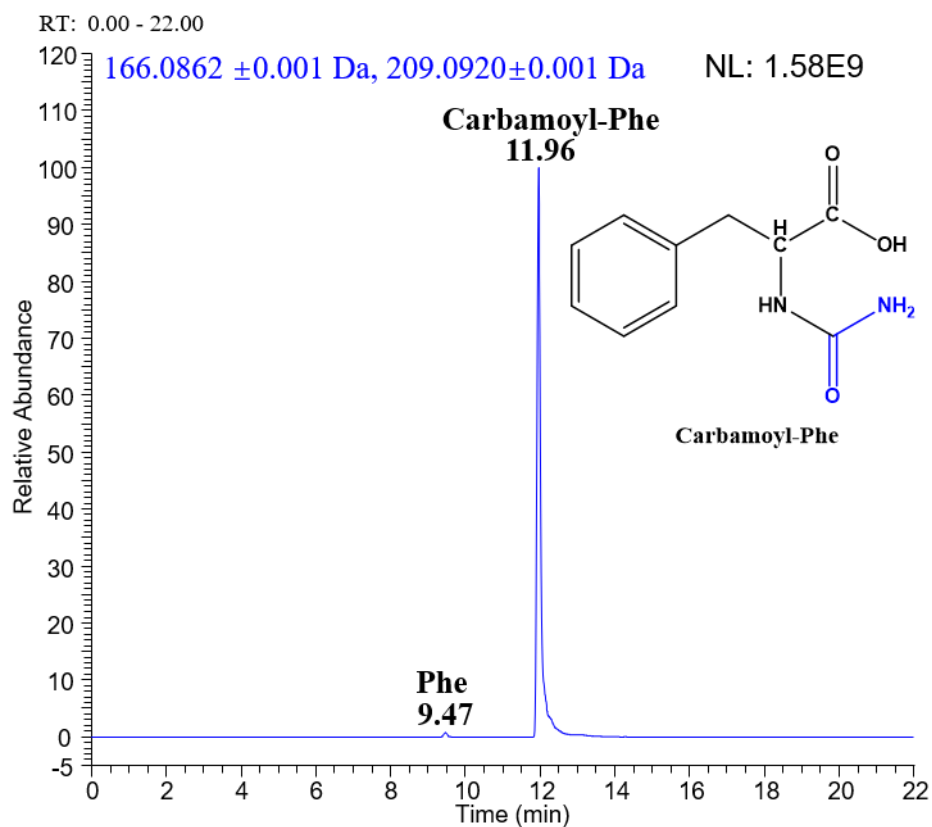

Figure S1. EIC-MS profile of Phe and Carbamoyl-Phe. HPLC conditions for single amino acid derivatives was as follows: mobile phase A: deionized water (0.1% formic acid); mobile phase B: acetonitrile. Gradient program was as follows: 0-5 min, 5%; 5-13 min, 5-75%; 13-15 min, 75%; 15-17 min, 75-5%, 17-22 min, 5% B. The eluent flow rate was 1 mL /min and the column was maintained at 30°C and 8  $\mu$ L of the sample was injected.

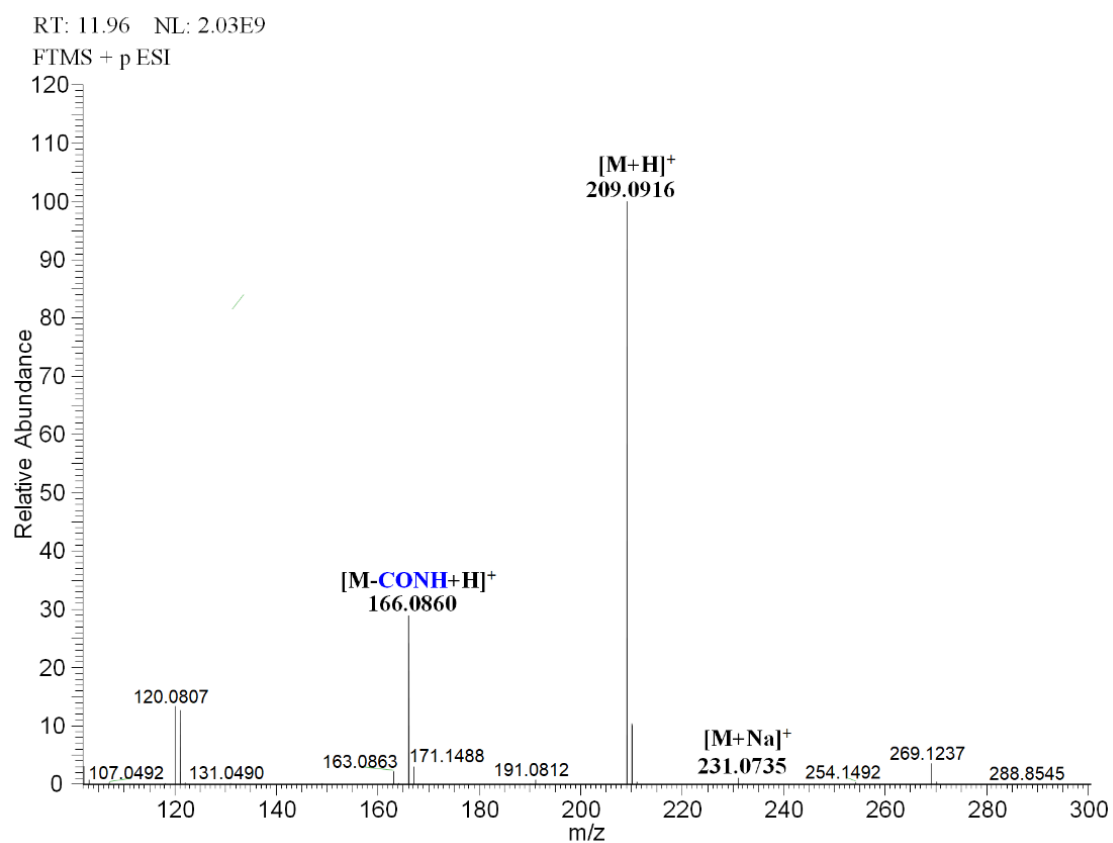

Figure S2. EIC-MS profile of the product carbamoyl-Phe.

RT: 0.00 - 21.89 SM: 7B

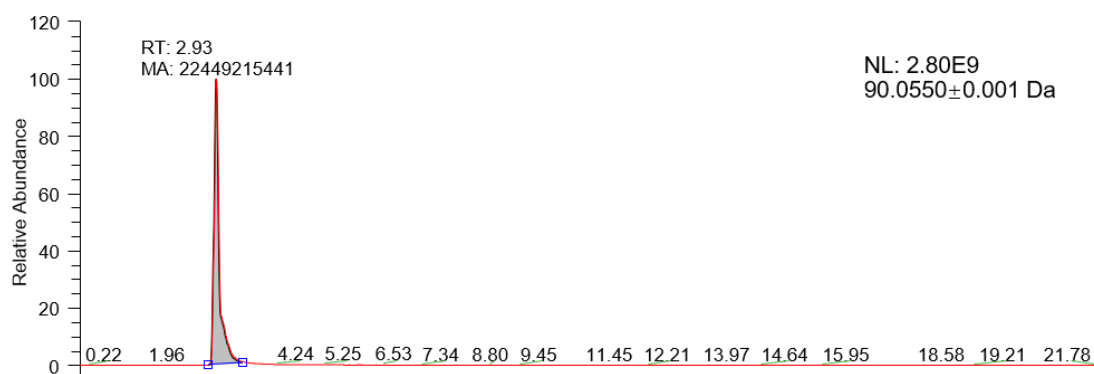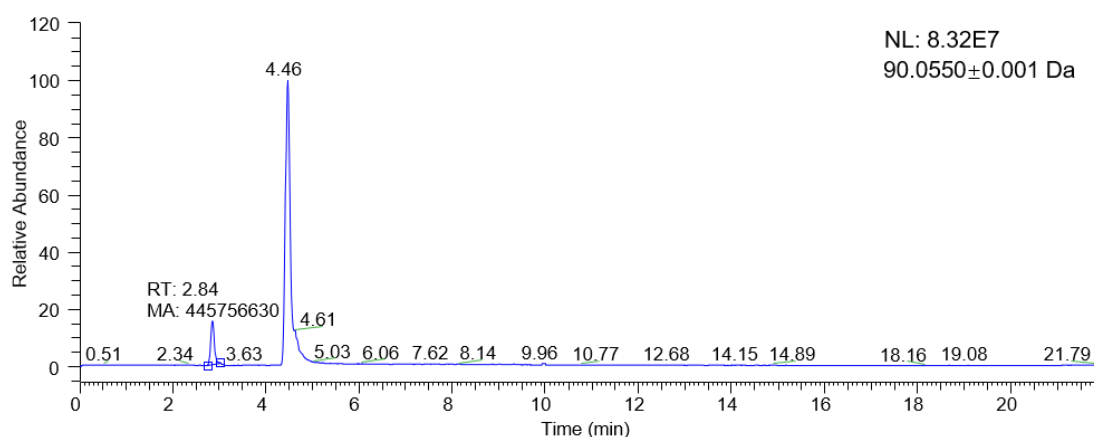

Figure S3. LC-MS-EIC profile of control sample and derivatization reaction sample of Ala. The calculated value of Ala  $[M+H]^+$  is 90.0550. The peak area of control sample (non-urea added) is 22449215441, and the peak area of residual Ala after derivatization reaction is 445756630. The conversion rate =  $(1 - (445756630 / 22449215441)) \times 100\% = 98.01\%$ . HPLC conditions for single amino acid derivatives were as follows: mobile phase A: deionized water (0.1% formic acid); mobile phase B: acetonitrile. Gradient program was as follows: 0-5 min, 5%; 5-13 min, 5-75%; 13-15 min, 75%; 15-17 min, 75-5%; 17-22 min, 5% B. The eluent flow rate was 1 mL/min and the column was maintained at 30°C and 8  $\mu$ L of the sample was injected.

RT: 0.00 - 22.00 SM: 7B

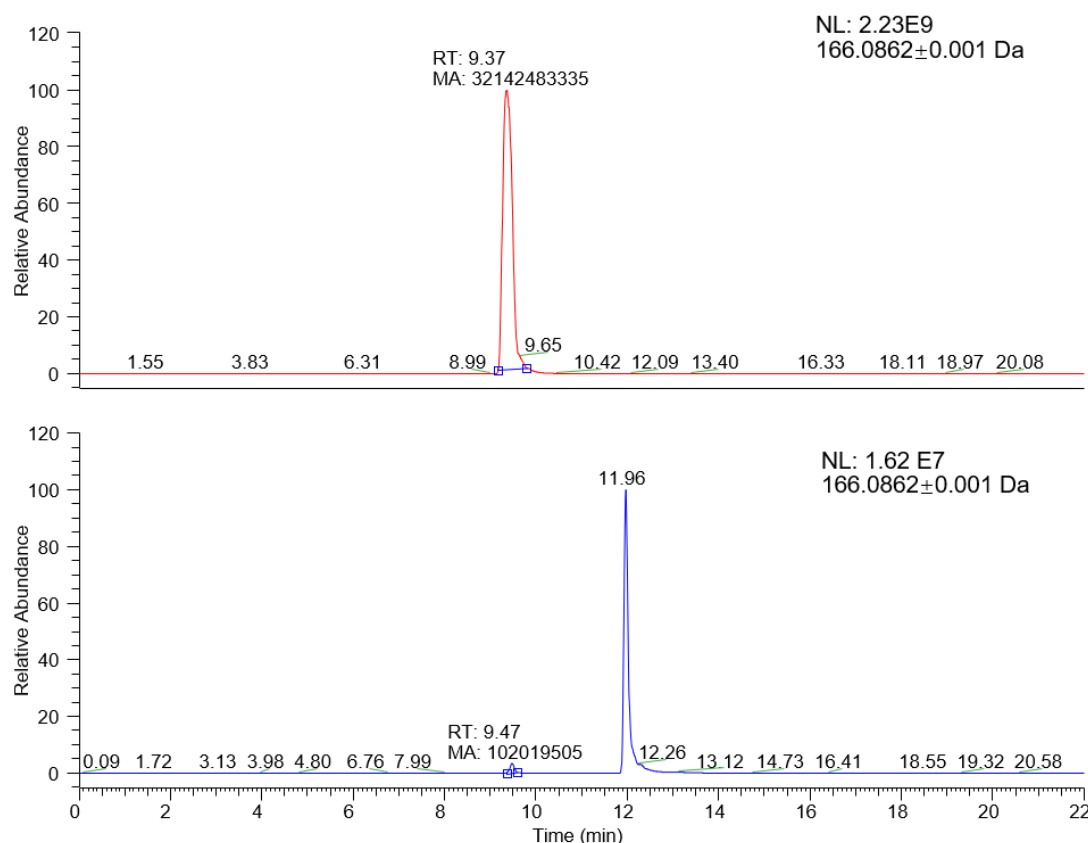

Figure S4. LC-MS-EIC profile of control sample and derivatization reaction sample of Phe. The calculated value of Phe  $[M+H]^+$  is 166.0862. The peak area of control sample (non-urea added) is 3214248335, and the peak area of residual Phe after derivatization reaction is 102019505. The conversion rate =  $(1 - (102019505/3214248335)) \times 100\% = 99.69\%$ . HPLC conditions for single amino acid derivatives were as follows: mobile phase A: deionized water (0.1% formic acid); mobile phase B: acetonitrile. Gradient program was as follows: 0-5 min, 5%; 5-13 min, 5-75%; 13-15 min, 75%; 15-17 min, 75-5%; 17-22 min, 5% B. The eluent flow rate was 1 mL/min and the column was maintained at 30°C and 8  $\mu$ L of the sample was injected.

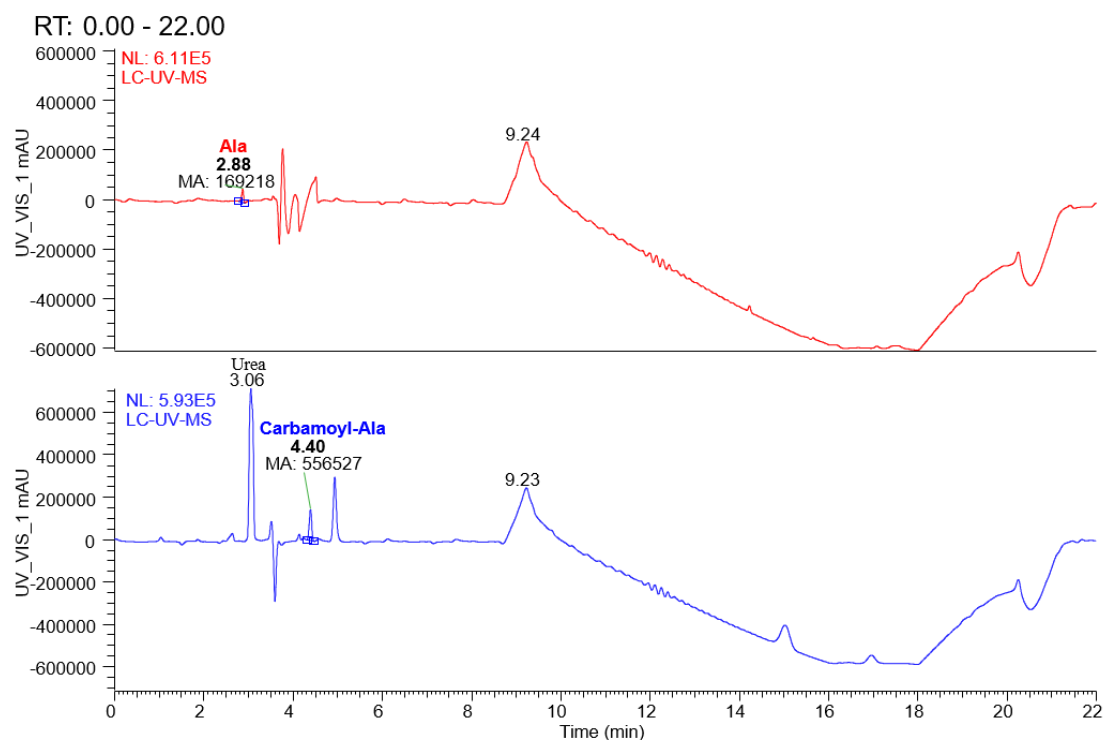

Figure S5. LC-UV profile of Ala and Carbamoyl-Ala (210 nm). NL values from the UV peaks of Ala and Carbamoyl-Ala.  $UV(\text{Carbamoyl-Ala})/UV(\text{Ala})=556527/169218=3.29$ . HPLC conditions for single amino acid derivatives were as follows: mobile phase A: deionized water (0.1% formic acid); mobile phase B: acetonitrile. Gradient program was as follows: 0-5 min, 5%; 5-13 min, 5-75%; 13-15 min, 75%; 15-17 min, 75-5%, 17-22 min, 5% B. The eluent flow rate was 1 mL /min and the column was maintained at 30°C and 8  $\mu\text{L}$  of the sample was injected.

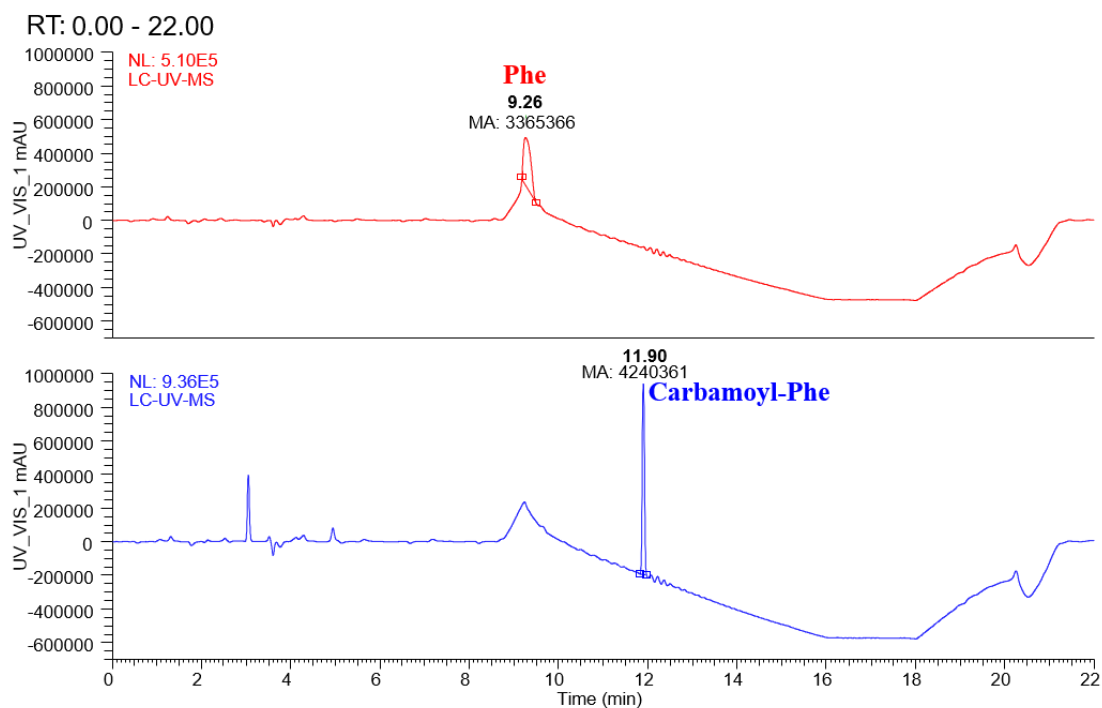

Figure S6. LC-UV profile of Phe and Carbamoyl-Phe (210 nm). NL values from the UV peaks of Phe and Carbamoyl-Phe.  $UV(\text{Carbamoyl-Phe})/UV(\text{Phe})=4240361/3365366=1.26$ . HPLC conditions for single amino acid derivatives were same as Figure S5.



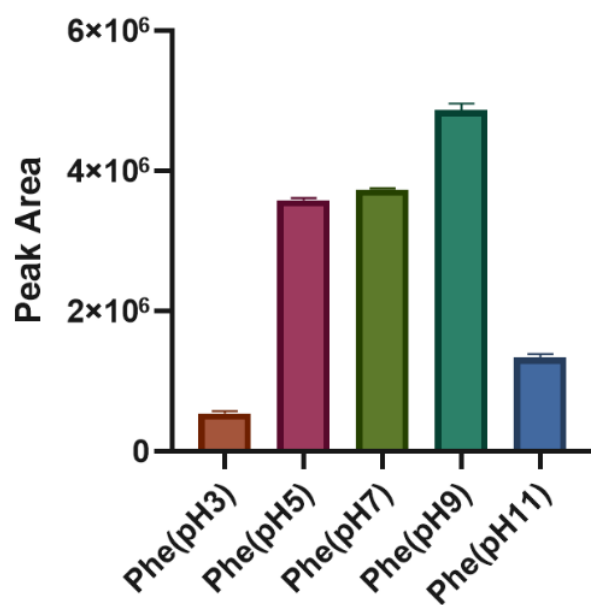

Figure S7. The yield of carbamoyl-Phe under different pH conditions (3-11).

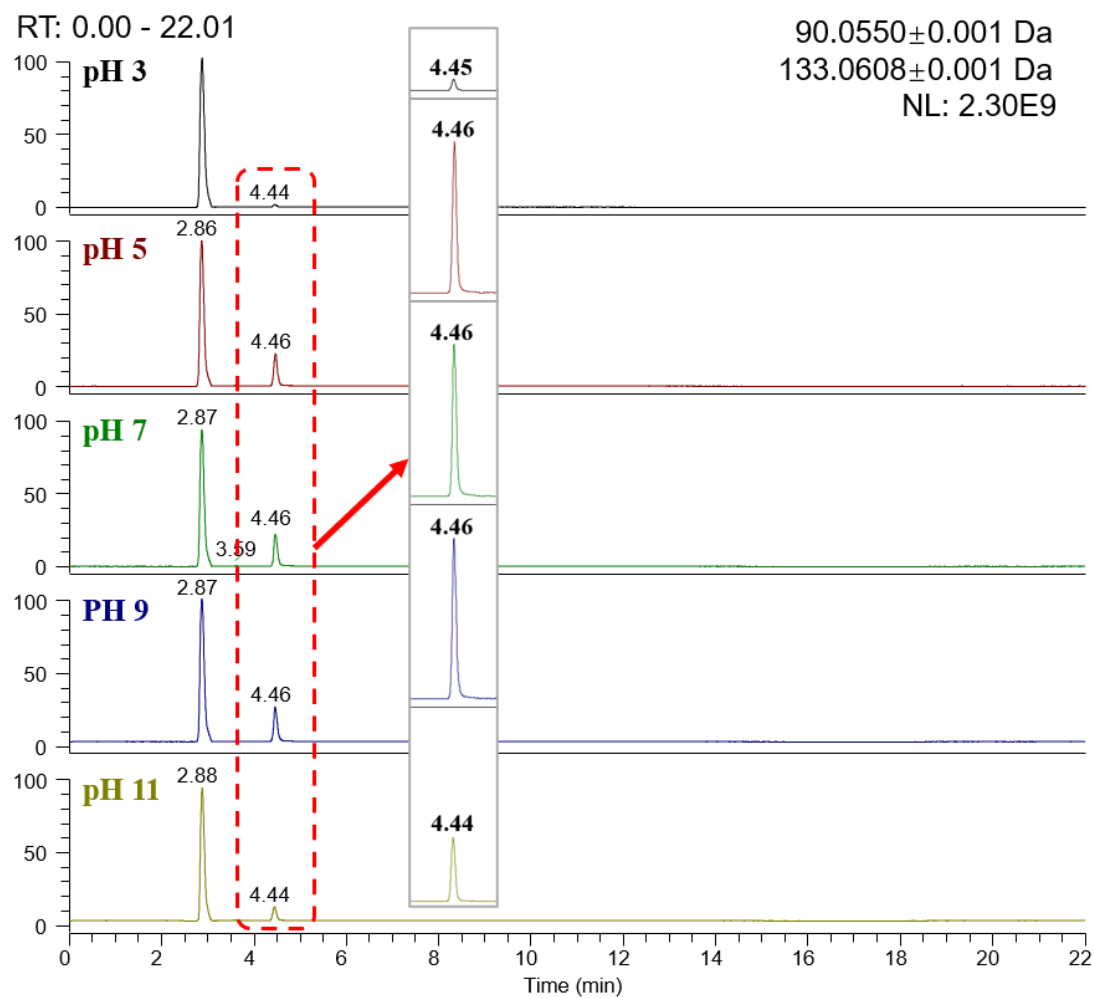

Figure S8. EIC-MS profile of Ala and carbamoyl-Ala under different pH conditions (3-11). HPLC conditions for single amino acid derivatives were same as Figure S5.

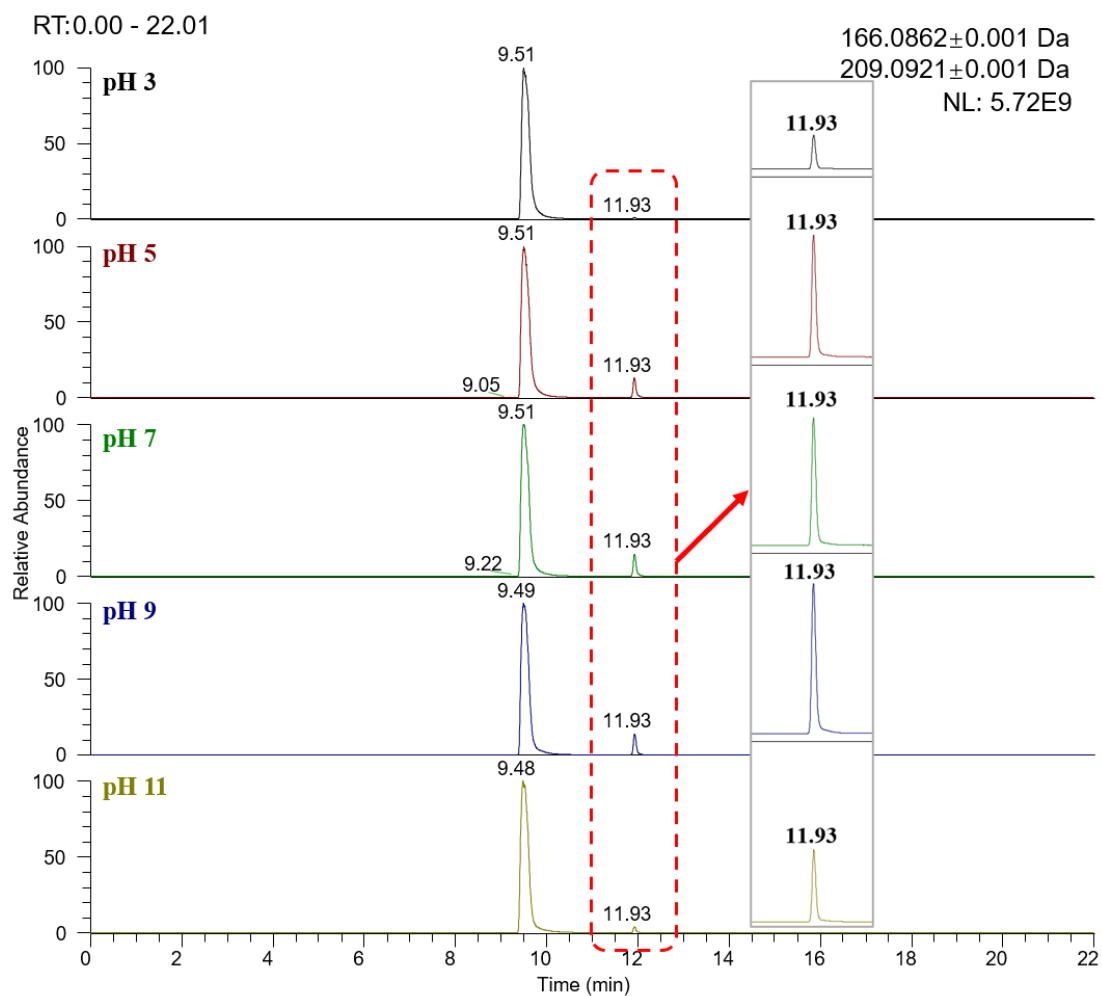

Figure S9. EIC-MS profile of Phe and carbamoyl-Phe under different pH conditions (3-11). HPLC conditions for single amino acid derivatives were same as Figure S5.

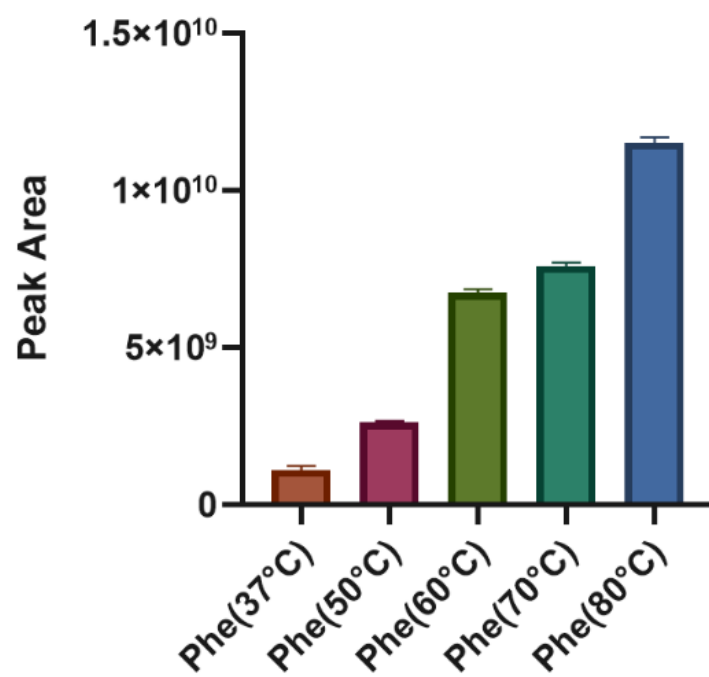

Figure S10. The yield of carbamoyl-Phe under different temperature conditions (37°C - 80°C).

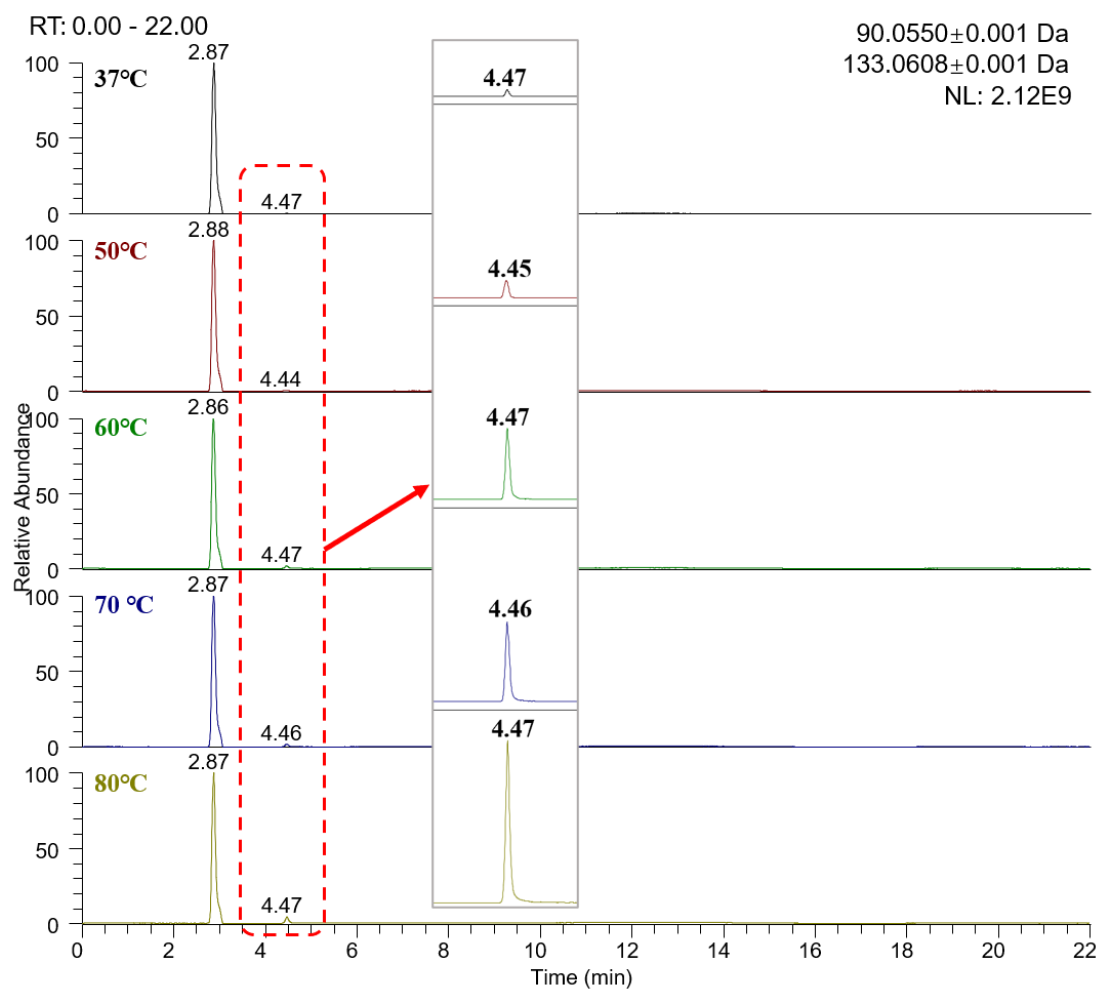

Figure S11. EIC-MS profile of Ala and carbamoyl-Ala under different temperature conditions (37°C -80°C). HPLC conditions for single amino acid derivatives were same as Figure S5.

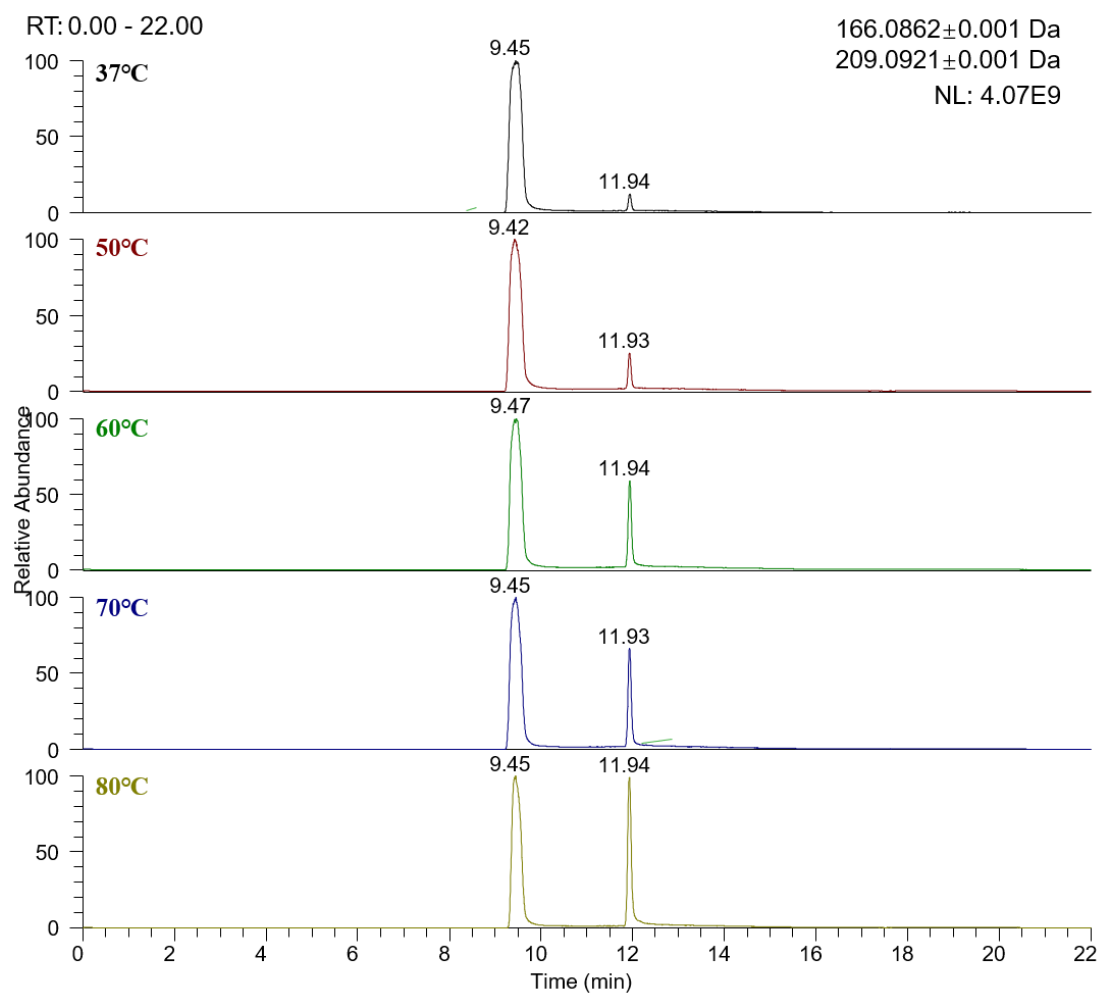

Figure S12. EIC-MS profile of Phe and carbamoyl-Phe under different temperature conditions (37°C -80°C). HPLC conditions for single amino acid derivatives were same as Figure S5.

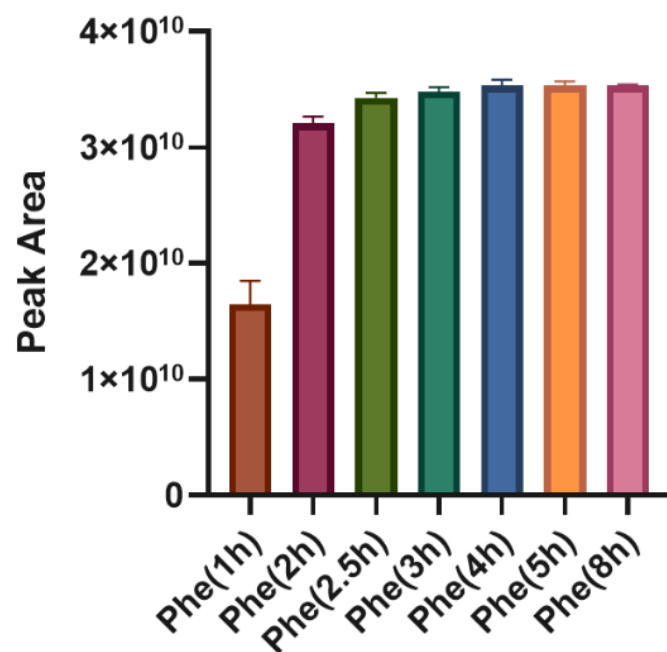

Figure S13. The yield of carbamoyl-Phe under different time conditions (1-8 h).

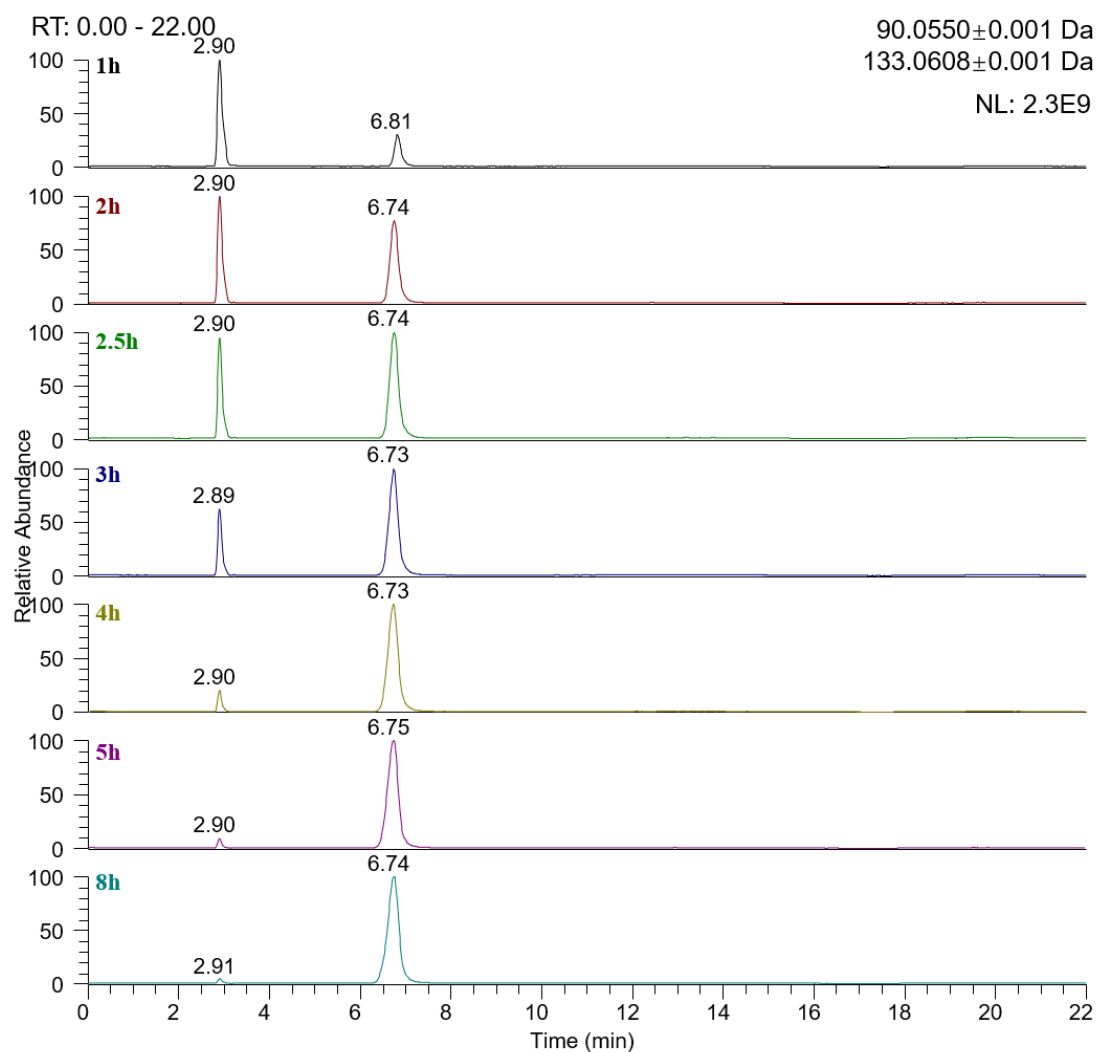

Figure S14. EIC-MS profile of Ala and carbamoyl-Ala under different time conditions (1-8 h). HPLC conditions for single amino acid derivatives were same as Figure S5.



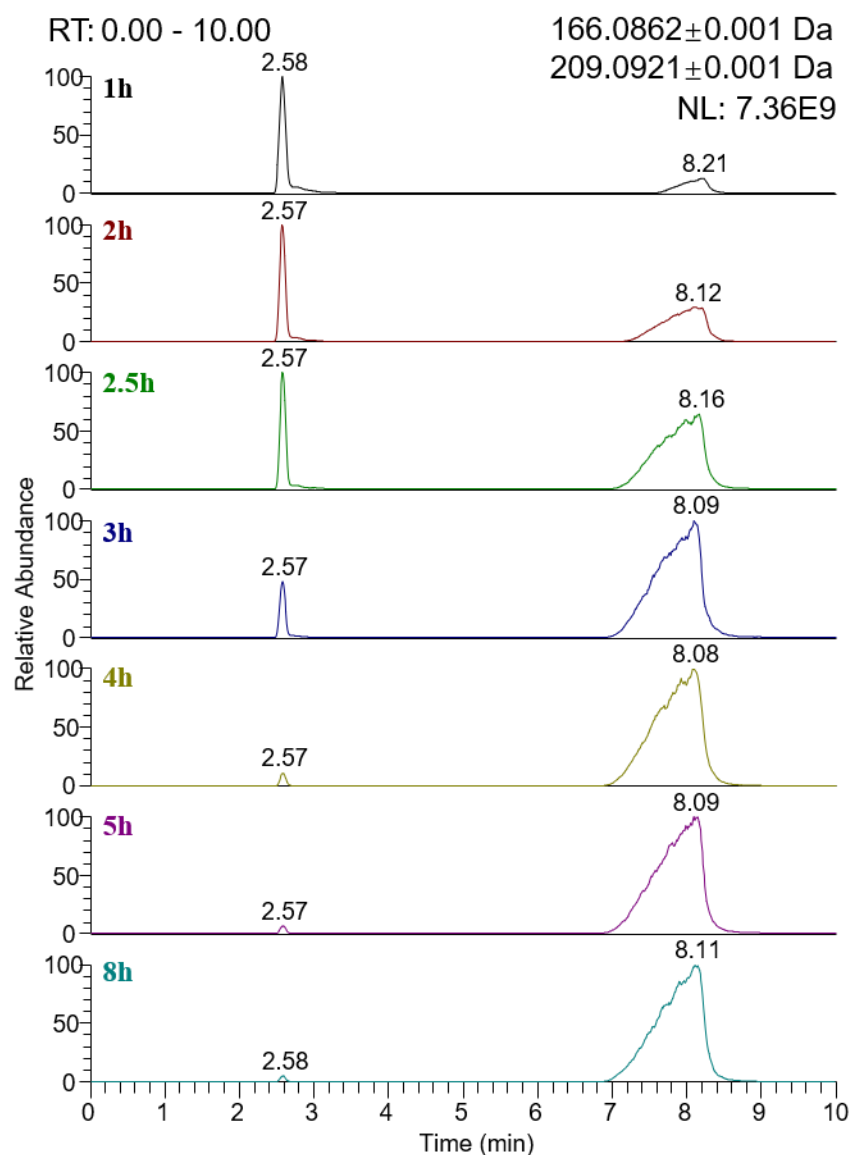

Figure S15. EIC-MS profile of Phe and carbamoyl-Phe under different time conditions (1-8 h). HPLC conditions for single amino acid derivatives was as follows: mobile phase A: deionized water (0.1% formic acid); mobile phase B: acetonitrile. Gradient program was as follows: 0-10 min, 50% B. The eluent flow rate was 1 mL /min and the column was maintained at 30°C and 2 $\mu$ L of the sample was injected.

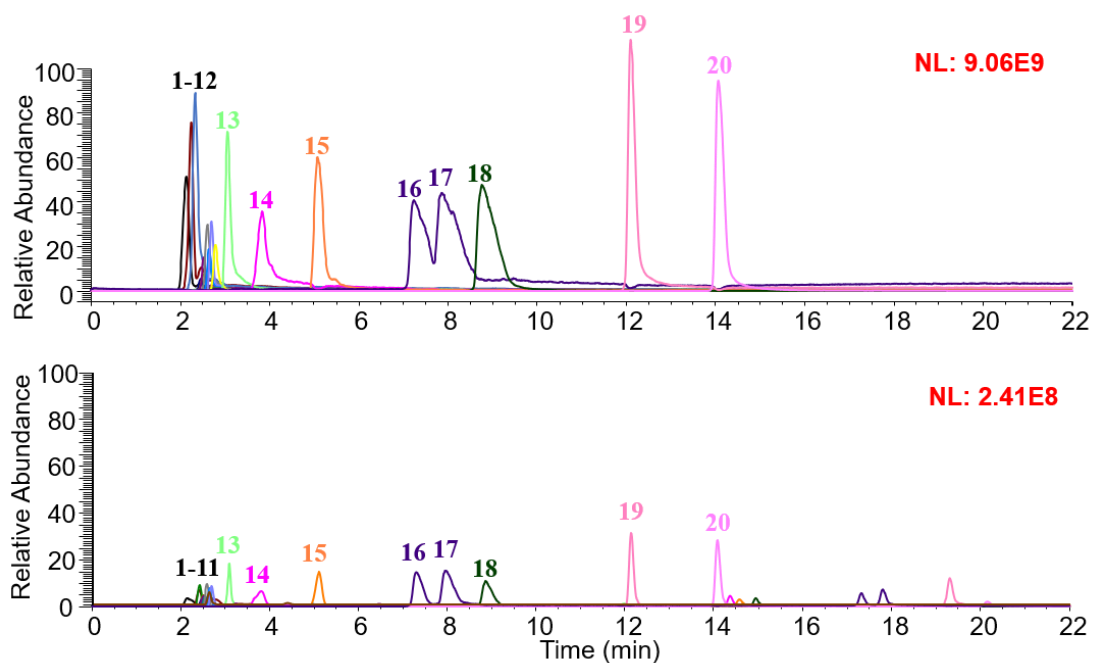

Figure S16. EIC-MS profile of 20 AAs before and after derivatization. a) EIC-MS profile of 20 AAs. b) EIC-MS profile of residual 20 AA in the derivate sample. AAs are marked with numbers as follows, 1: Lys, 2: His, 3: Arg, 4: Gly, 5: Ser, 6: Asn, 7: Ala, 8: Gln, 9: Asp, 10: Thr, 11: Glu, 12: Cys, 13: Pro, 14: Val, 15: Met, 16: Ile, 17: Leu, 18: Tyr, 19: Phe and 20: Trp. The m/z extraction range of AAs and CAAs were listed in Table S1.

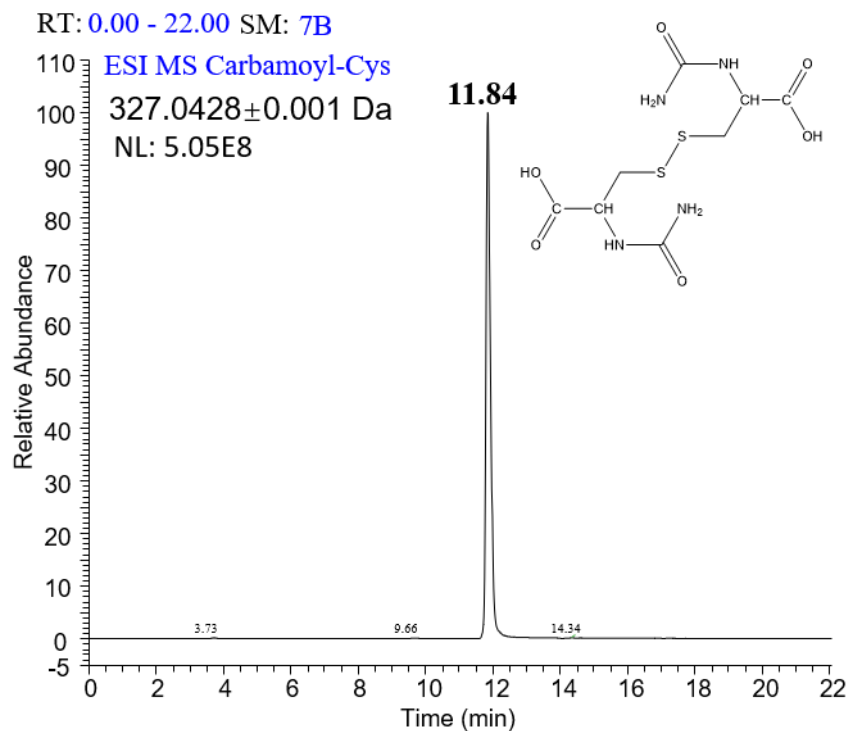

Figure S17. EIC-MS profile of 3,3'-disulfanedibis(2-ureidopropanoic acid). HPLC conditions for derivatization of 20 kinds of amino acid mixed derivatives were as follows: mobile phase A: deionized water (0.1% formic acid); mobile phase B: acetonitrile. Gradient program was as follows: 0-5 min, 5%; 5-45 min, 5-90%; 45-50 min, 90-5%; 50-55min, 5% B. The eluent flow rate was 1 mL/min and the column was maintained at 30 °C and 8 µL of the sample was injected. 3,3'-disulfanedibis(2-ureidopropanoic acid)

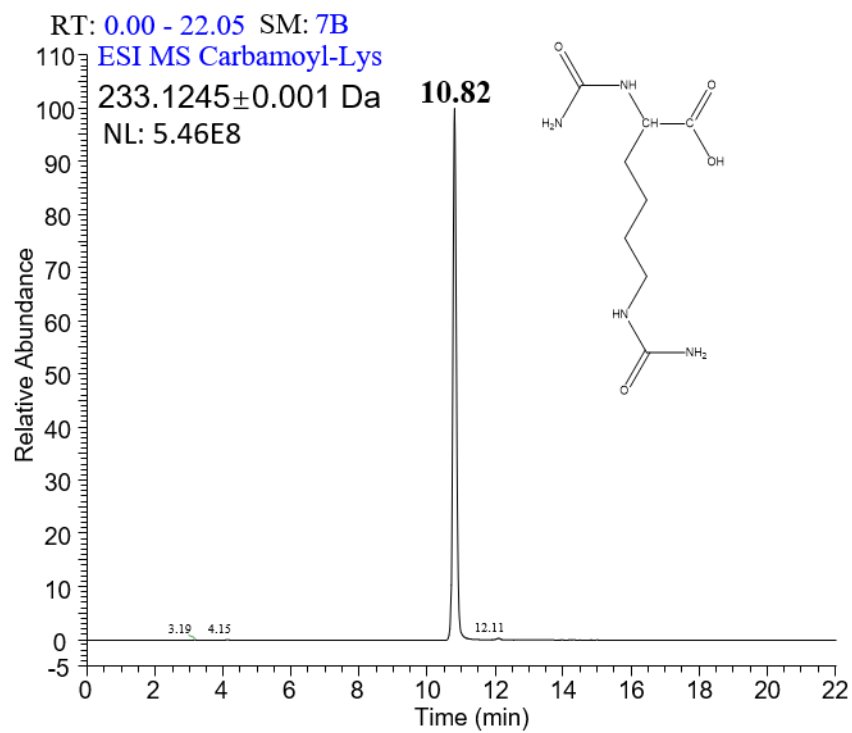

Figure S18. EIC-MS profile of N<sup>2</sup>, N<sup>6</sup>-dicarbamoyllysine. HPLC conditions for derivatization of 20 kinds of amino acid mixed derivatives were same as Figure S15.

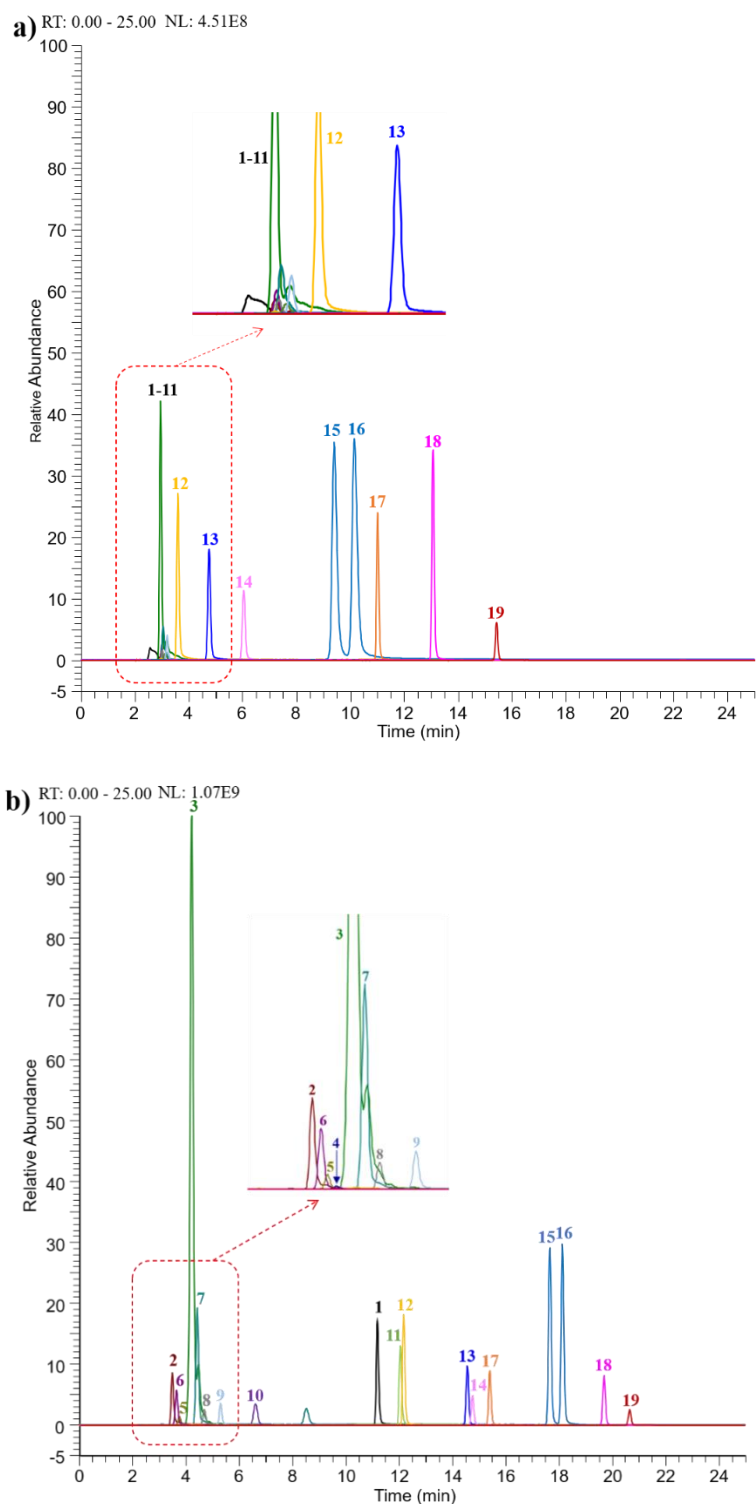

Figure S19. Derivatization of complex sample. a) EIC-MS profile of Cell culture medium RPMI 1640. b) EIC-MS profile of Cell culture medium RPMI 1640 after derivatization. Amino acids are marked with numbers as follows, 1: Lys, 2: His, 3: Arg, 4: Gly, 5: Ser, 6: Asn, 7: Gln, 8: Asp, 9: Thr, 10: Glu, 11: Cys, 12: Pro, 13: Val, 14: Met, 15: Ile, 16: Leu, 17: Tyr, 18: Phe and 19: Trp. The  $m/z$  extraction range of AAs and CAAs were listed in Table S1.

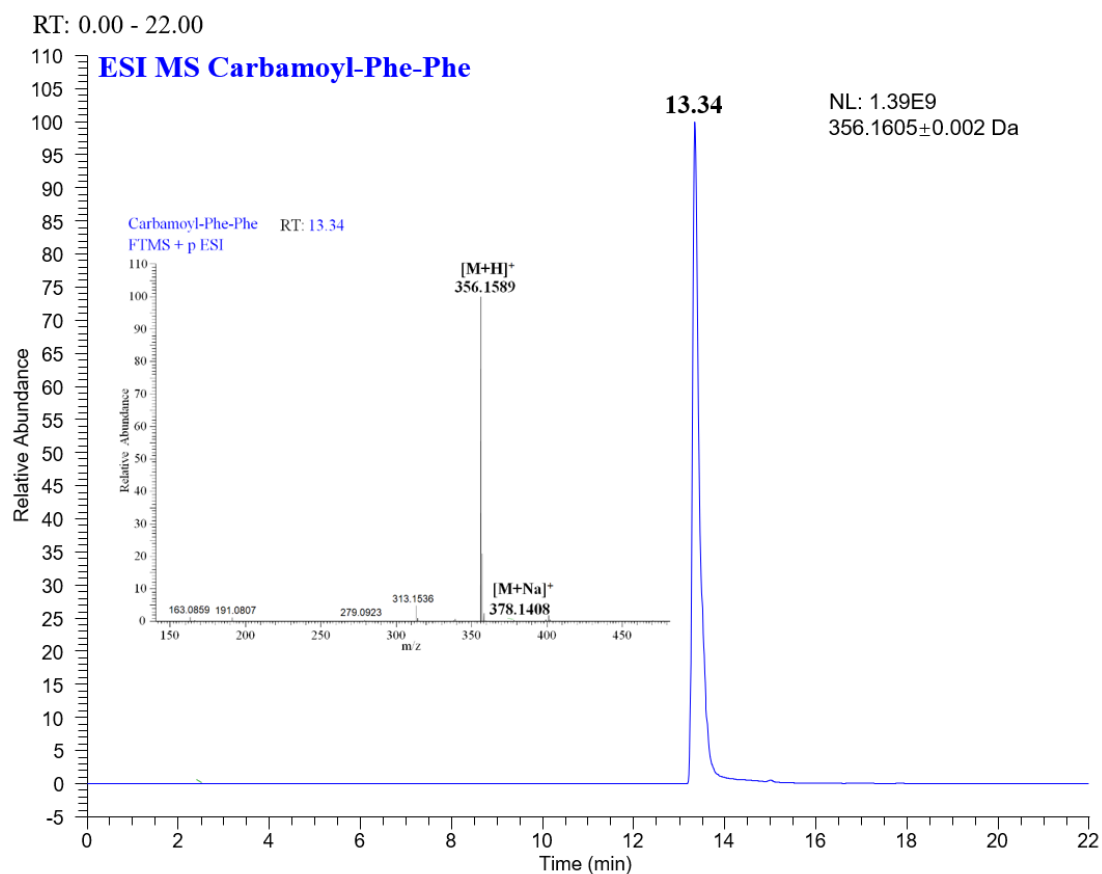

Figure S20. EIC-MS profile of carbamoyl-Phe-Phe. HPLC conditions for single amino acid derivatives was same as Figure S3.

Table S1 m/z extraction range of AAs and CAAs.

| AA  | [M+H] <sup>+</sup> <sup>a</sup> | [M+H] <sup>+</sup> <sup>b</sup> | extraction range <sup>a</sup> | extraction range <sup>b</sup> |
|-----|---------------------------------|---------------------------------|-------------------------------|-------------------------------|
| Lys | 147.1128                        | 233.1245                        | 147.1128±0.001 Da             | 233.1245±0.001 Da             |
| His | 156.0768                        | 199.0826                        | 156.0768±0.001 Da             | 199.0826±0.001 Da             |
| Arg | 175.1190                        | 218.1248                        | 175.1190±0.001 Da             | 218.1248±0.001 Da             |
| Gly | 76.0393                         | 119.0451                        | 76.0393±0.001 Da              | 119.0451±0.001 Da             |
| Ser | 106.0499                        | 149.0557                        | 106.0499±0.001 Da             | 149.0557±0.001 Da             |
| Asn | 133.0608                        | 176.0666                        | 133.0608±0.001 Da             | 176.0666±0.001 Da             |
| Ala | 90.0550                         | 133.0608                        | 90.0550±0.001 Da              | 133.0608±0.001 Da             |
| Gln | 147.0764                        | 190.0822                        | 147.0764±0.001 Da             | 190.0822±0.001 Da             |
| Asp | 134.0448                        | 177.0506                        | 134.0448±0.001 Da             | 177.0506±0.001 Da             |
| Thr | 120.0655                        | 163.0713                        | 120.0655±0.001 Da             | 163.0713±0.001 Da             |
| Glu | 148.0604                        | 191.0662                        | 148.0604±0.001 Da             | 191.0662±0.001 Da             |
| Cys | 122.0270                        | 327.0428                        | 122.0280±0.001 Da             | 327.0428±0.001 Da             |
| Pro | 116.0706                        | 159.0764                        | 116.0706±0.001 Da             | 159.0764±0.001 Da             |
| Val | 118.0863                        | 161.0921                        | 118.0863±0.001 Da             | 161.0921±0.001 Da             |
| Met | 150.0583                        | 193.0641                        | 150.0583±0.001 Da             | 193.0641±0.001 Da             |
| Ile | 132.1019                        | 175.1077                        | 132.1019±0.001 Da             | 175.1077±0.001 Da             |
| Leu | 132.1019                        | 175.1077                        | 132.1019±0.001 Da             | 175.1077±0.001 Da             |
| Tyr | 182.0812                        | 225.087                         | 182.0812±0.001 Da             | 225.087±0.001 Da              |
| Phe | 166.0862                        | 209.0920                        | 166.0862±0.001 Da             | 209.0920±0.001 Da             |
| Trp | 205.0972                        | 248.1030                        | 205.0972±0.001 Da             | 248.1030±0.001 Da             |

a: [M+H]<sup>+</sup> and m/z extraction range of 20 AAs in Fig. 3, Fig. 4 and Fig. S19; b: [M+H]<sup>+</sup> and m/z extraction range of 20 CAAs in Fig. 3, Fig. 4 and Fig. S19.

Table S2 Changes in retention time before and after AA derivatization

| AA  | retention time (a) | retention time (b) |
|-----|--------------------|--------------------|
| Lys | 2.18               | 10.82              |
| His | 2.27               | 2.78               |
| Arg | 2.33               | 2.96               |
| Gly | 2.48               | 3.59               |
| Ser | 2.54               | 3.55               |
| Asn | 2.55               | 3.25               |
| Ala | 2.58               | 3.27               |
| Gln | 2.61               | 4.03               |
| Asp | 2.61               | 4.43               |
| Thr | 2.66               | 5.02               |
| Glu | 2.70               | 6.21               |
| Cys | 2.80               | 11.84              |
| Pro | 3.06               | 11.82              |
| Val | 3.83               | 14.36              |
| Met | 5.09               | 14.69              |
| Ile | 7.24               | 17.33              |
| Leu | 7.89               | 17.80              |
| Tyr | 8.76               | 14.92              |
| Phe | 12.09              | 19.29              |
| Trp | 14.03              | 20.14              |

a: Retention times of 20 AAs on reversed-phase columns. b: Retention times of 20 CAAs on reversed-phase columns.



Table S3 Derivatized conversion rate of 20 AA Mixtures.

| AA  | Conversion rate (%) | AA  | Conversion rate (%) |
|-----|---------------------|-----|---------------------|
| Lys | 98.57%              | Glu | 99.37%              |
| His | 97.06%              | Cys | ~100%               |
| Arg | 98.68%              | Pro | 97.24%              |
| Gly | 98.27%              | Val | 98.30%              |
| Ser | 97.10%              | Met | 98.56%              |
| Asn | 99.59%              | Ile | 96.83%              |
| Ala | 99.10%              | Leu | 96.65%              |
| Gln | 97.64%              | Tyr | 99.09%              |
| Asp | 99.35%              | Phe | 96.46%              |
| Thr | 99.54%              | Trp | 96.30%              |

\* The conversion rate of amino acid derivatization was obtained from the ratio of the residual peak area and the original peak area before and after the reaction. The residual peak area of Cys was not detected.

Table S4 Formulation of cell culture medium DMEM. Cat.No is 10-013 (CORNING). Type of cell culture medium is Liquid, 1x. The unit of components is mg/L.

| <b>Components</b>                                      |         |                                                     |         |
|--------------------------------------------------------|---------|-----------------------------------------------------|---------|
| <b>Amino Acids</b>                                     |         |                                                     |         |
| L-Arginine • HCl                                       | 84.00   | L-Methionine                                        | 30.00   |
| L-Cystine•2HCl                                         | 62.57   | L-Phenylalanine                                     | 66.00   |
| L-Glutamine                                            | 584.00  | L-Serine                                            | 42.00   |
| Glycine                                                | 30.00   | L-Threonine                                         | 95.20   |
| L-Histidine • HCl • H <sub>2</sub> O                   | 42.00   | L-Tyrosine • 2Na • 2H <sub>2</sub> O                | 103.79  |
| L-Isoleucine                                           | 104.80  | L-Tryptophan                                        | 16.00   |
| L-Leucine                                              | 104.80  | L-Valine                                            | 94.00   |
| L-Lysine•HCl                                           | 146.20  |                                                     |         |
| <b>Inorganic Salts</b>                                 |         |                                                     |         |
| CaCl <sub>2</sub> (anhydrous)                          | 200.00  | NaCl                                                | 6400.00 |
| KCl                                                    | 400.00  | NaH <sub>2</sub> PO <sub>4</sub> • H <sub>2</sub> O | 125.00  |
| MgSO <sub>4</sub> (anhydrous)                          | 97.70   | NaHCO <sub>3</sub>                                  | 3700.00 |
| Fe (NO <sub>3</sub> ) <sub>3</sub> • 9H <sub>2</sub> O | 0.10    |                                                     |         |
| <b>Vitamins</b>                                        |         |                                                     |         |
| D-Calcium pantothenate                                 | 4.00    | Pyridoxine•HCl                                      | 4.00    |
| Choline chloride                                       | 4.00    | Riboflavin                                          | 0.40    |
| Folic acid                                             | 4.00    | Thiamine•HCl                                        | 4.00    |
| i-Inositol                                             | 7.20    | Nicotinamide                                        | 4.00    |
| <b>Other</b>                                           |         |                                                     |         |
| D-Glucose                                              | 4500.00 | Phenol red•Na                                       | 15      |
| Sodium pyruvate                                        | 110.00  |                                                     |         |

Related information from [www.corning.com/lifesciences/media](http://www.corning.com/lifesciences/media).

Table S5 Formulation of cell culture medium RPMI 1640. Cat.No is 10-040 (CORNING).  
Type of cell culture medium is Liquid, 1x. The unit of components is mg/L.

| <b>Components</b>                                    |         |                                              |         |
|------------------------------------------------------|---------|----------------------------------------------|---------|
| <b>Amino Acids</b>                                   |         |                                              |         |
| L-Arginine                                           | 200.00  | L-Lysine•HCl                                 | 40.00   |
| L-Asparagine•H <sub>2</sub> O                        | 56.82   | L-Methionine                                 | 15.00   |
| L-Aspartic acid                                      | 20.00   | L-Phenylalanine                              | 15.00   |
| L-Cystine•2HCl                                       | 65.20   | L-Proline                                    | 20.00   |
| L-Glutamic acid                                      | 20.00   | L-Serine                                     | 30.00   |
| L-Glutamine                                          | 300.00  | L-Threonine                                  | 20.00   |
| Glycine                                              | 10.00   | L-Tryptophan                                 | 5.00    |
| L-Histidine                                          | 15.00   | L-Tyrosine•2Na•2H <sub>2</sub> O             | 28.83   |
| L-Isoleucine                                         | 50.00   | L-Valine                                     | 20.00   |
| L-Leucine                                            | 50.00   | Hydroxy-L-proline                            | 20.00   |
| <b>Inorganic Salts</b>                               |         |                                              |         |
| Ca(NO <sub>3</sub> ) <sub>2</sub> •4H <sub>2</sub> O | 100.00  | NaCl                                         | 6000.00 |
| KCl                                                  | 400.00  | Na <sub>2</sub> HPO <sub>4</sub> (anhydrous) | 800.70  |
| MgSO <sub>4</sub> (anhydrous)                        | 48.80   | NaHCO <sub>3</sub>                           | 2000.00 |
| <b>Vitamins</b>                                      |         |                                              |         |
| Biotin                                               | 0.20    | Pyridoxine•HCl                               | 1.00    |
| D-Calcium pantothenate                               | 0.025   | Para-Aminobenzoic acid                       | 1.00    |
| Choline chloride                                     | 3.00    | Riboflavin                                   | 0.20    |
| Folic acid                                           | 1.00    | Thiamine•HCl                                 | 1.00    |
| i-Inositol                                           | 35.00   | Vitamin B <sub>12</sub>                      | 0.005   |
| Nicotinamide                                         | 1.00    |                                              |         |
| <b>Other</b>                                         |         |                                              |         |
| D-Glucose                                            | 2000.00 | Phenol red•Na                                | 5       |
| Glutathione (reduced)                                | 1.00    |                                              |         |

Related information from [www.corning.com/lifesciences/media](http://www.corning.com/lifesciences/media).

Table S6 Derivatized conversion rate of AAs in Cell culture medium DMEM.

| AA  | Conversion rate (%) | AA  | Conversion rate (%) |
|-----|---------------------|-----|---------------------|
| Lys | 98.63%              | Val | 98.55%              |
| His | 99.20%              | Met | 99.41%              |
| Arg | 99.15%              | Ile | 98.08%              |
| Gly | ~100%*              | Leu | 97.76%              |
| Ser | 99.23%              | Tyr | 99.33%              |
| Gln | 93.19%              | Phe | 99.46%              |
| Thr | 98.51%              | Trp | 99.33%              |
| Cys | ~100%*              |     |                     |

\* The conversion rate of amino acid derivatization was obtained from the ratio of the residual peak area and the original peak area before and after the reaction. The residual peak area of Gly and Cys was not detected.
